# Supplementary material for: Long-Term Changes of Inflammatory Biomarkers in Individuals on Suppressive Three-Drug or Two-Drug Antiretroviral Regimens
Source: PubMed Central journal article supplement (PMC8964183; doi:10.3389/fimmu.2022.848630), 2022-03-14
Supplement: DataSheet_1.pdf [file DataSheet_1.pdf]

# Long-Term Changes of Inflammatory Biomarkers in Individuals on Suppressive Three-drug or Two-drug Antiretroviral Regimens

## Supplemental Materials

### Supplemental tables

**Table S1. Population baseline characteristics according to the ART regimen in the whole cohort.**

|                                                                                | Subjects<br>remaining on 3DR<br><b>N=7665</b> | Subjects<br>changing to<br>2DR<br><b>N=424</b> | Subjects<br>changing to MT<br><b>N=327</b> | p value |
|--------------------------------------------------------------------------------|-----------------------------------------------|------------------------------------------------|--------------------------------------------|---------|
| <b>Age (mean, [SD])</b>                                                        | 37 (30 – 44)                                  | 38 (31 – 45)                                   | 37 (30 – 45)                               | 0.02    |
| <b>Gender, n (%)</b>                                                           |                                               |                                                |                                            | 0.009   |
| Male                                                                           | 6480 (84.5)                                   | 323 (80.9)                                     | 260 (79.5)                                 |         |
| Female                                                                         | 1185 (15.5)                                   | 76 (19.1)                                      | 67 (20.5)                                  |         |
| <b>Mode of transmission, n(%)</b>                                              |                                               |                                                |                                            | 0.003   |
| MSM                                                                            | 4698 (61.3)                                   | 236 (59.1)                                     | 166 (50.8)                                 |         |
| Heterosexual                                                                   | 466 (6.1)                                     | 25 (6.3)                                       | 32 (9.8)                                   |         |
| IDU                                                                            | 2235 (29.2)                                   | 118 (29.6)                                     | 116 (35.5)                                 |         |
| Unknown                                                                        | 266 (3.5)                                     | 20 (5.0)                                       | 13 (4.0)                                   |         |
| <b>Spanish Origin, n (%)</b>                                                   | 4739 (61.8)                                   | 230 (54.2)                                     | 168 (51.4)                                 | <0.001  |
| <b>Education level, n (%)</b>                                                  |                                               |                                                |                                            | <0.001  |
| No studies or compulsory                                                       | 2217 (28.9)                                   | 148 (34.9)                                     | 111 (33.9)                                 |         |
| Upper secondary or university                                                  | 4097 (53.5)                                   | 226 (53.3)                                     | 182 (55.7)                                 |         |
| Unknown                                                                        | 1351 (17.6)                                   | 50 (11.8)                                      | 34 (10.4)                                  |         |
| <b>AIDS diagnosis, n (%)</b>                                                   | 873 (11.4)                                    | 48 (12.0)                                      | 46 (14.1)                                  | 0.31    |
| <b>HCV positive ever, n (%)</b>                                                | 680 (8.9)                                     | 41 (10.3)                                      | 44 (13.5)                                  | 0.001   |
| <b>Maximum HIV-1 RNA, n (%)</b>                                                |                                               |                                                |                                            | 0.04    |
| <100000 copies/mL                                                              | 4749 (62.0)                                   | 262 (61.8)                                     | 200 (61.2)                                 |         |
| ≥100000 copies/mL                                                              | 2580 (33.7)                                   | 153 (36.1)                                     | 120 (36.7)                                 |         |
| Unknown                                                                        | 336 (4.4)                                     | 9 (2.1)                                        | 7 (2.1)                                    |         |
| <b>Time from ART initiation to virologic suppression (years), median (IQR)</b> | 0.3 (0.2 – 0.5)                               | 0.3 (0.2 – 0.5)                                | 0.3 (0.2 – 0.5)                            | 0.03    |

|                                                                                                 |                 |                 |                 |        |
|-------------------------------------------------------------------------------------------------|-----------------|-----------------|-----------------|--------|
| <b>Time from virologic suppression (years) to ART switch, median (IQR)</b>                      | -               | 3.4 (1.8 – 5.9) | 2.7 (1.3 – 4.2) | 0.012  |
| <b>Nadir CD4 cell count (cells/<math>\mu</math>L), median (IQR)</b>                             | 321 (198 – 463) | 290 (159 – 417) | 270 (151 – 366) | <0.001 |
| <b>Time from ART initiation to censoring, median [years (IQR)]</b>                              | 3.8 (2.0 – 6.5) | 6.0 (3.8 – 8.4) | 7.3 (5.3-9.5)   | <0.001 |
| <b>Number of HIV RNA determinations from ART initiation to last study contact median (IQR)]</b> | 13 (7 – 20)     | 20 (14 – 27)    | 23 (16 – 30)    | <0.001 |

Abbreviations: 3DR, triple therapy; 2DR, 2-drug combinations; MT, monotherapy; ART, antiretroviral therapy; IDU, injecting drug use; MSM, men who have sex with men.

**Table S2. Rate of severe non-AIDS events during the follow-up**

|                                      | 3DR   | 2DR   | MT    |
|--------------------------------------|-------|-------|-------|
|                                      | N=90  | N=58  | N=23  |
| <b>Mortality</b>                     | 0 (0) | 0 (0) | 0 (0) |
| <b>Cardiometabolic (N, %)</b>        |       |       |       |
| Diabetes                             | 2 (2) | 1 (2) | 0 (0) |
| Myocardial infarction                | 1 (1) | 0 (0) | 1 (4) |
| Stroke                               | 0 (0) | 2 (3) | 0 (0) |
| <b>Non-AIDS malignancies (N, %)</b>  | 0 (0) | 2 (3) | 0 (0) |
| <b>Visceral leishmaniasis (N, %)</b> | 1 (1) | 0 (0) | 0 (0) |

**Table S3. Adjusted coefficients of inflammatory biomarker changes by ART strategy (MT vs. 3DR) at year 0-3 and 3-8 from virologic suppression.**

|                                       | <b>Coefficient</b> | <b>95% CI</b>   | <b>p</b>     |
|---------------------------------------|--------------------|-----------------|--------------|
| <b>Years 0-3 of viral suppression</b> |                    |                 |              |
| IL-6 (log10)                          | 0.066              | -0.036, 0.167   | 0.204        |
| hs-CRP                                | 0.067              | -0.034, 0.170   | 0.194        |
| D-dimers                              | -27.256            | -45.877, -8.636 | <b>0.004</b> |
| IFABP                                 | -0.973             | -2-23, 0.292    | 0.132        |
| sCD163 (log10)                        | 0.067              | 0.004, 0.131    | 0.038        |
| sCD14                                 | 0.102              | -0.122, 0.326   | 0.373        |
| <b>Years 3-8 of viral suppression</b> |                    |                 |              |
| IL-6 (log10)                          | -0.027             | -0.159, 0.106   | 0.690        |
| hs-CRP                                | 0.052              | 0.051, 0.155    | 0.328        |
| D-dimers                              | 26.179             | 9.806           | 42.552       |
| IFABP                                 | 0.453              | 0.598, 1.506    | 0.398        |
| sCD163 (log10)                        | 0.041              | -0.022, 0.103   | 0.201        |
| sCD14                                 | 0.114              | 0-069, 0.297    | 0.225        |

\*Reference category: MT

Abbreviations: ART, antiretroviral therapy; 3DR, triple therapy; MT, monotherapy; CI, confidence interval; INSTI, integrase strand transfer inhibitor; NRTI, nucleoside reverse transcriptase inhibitor; NNRTI, nonnucleoside reverse transcriptase inhibitor; PI, protease inhibitor

## Supplemental figures

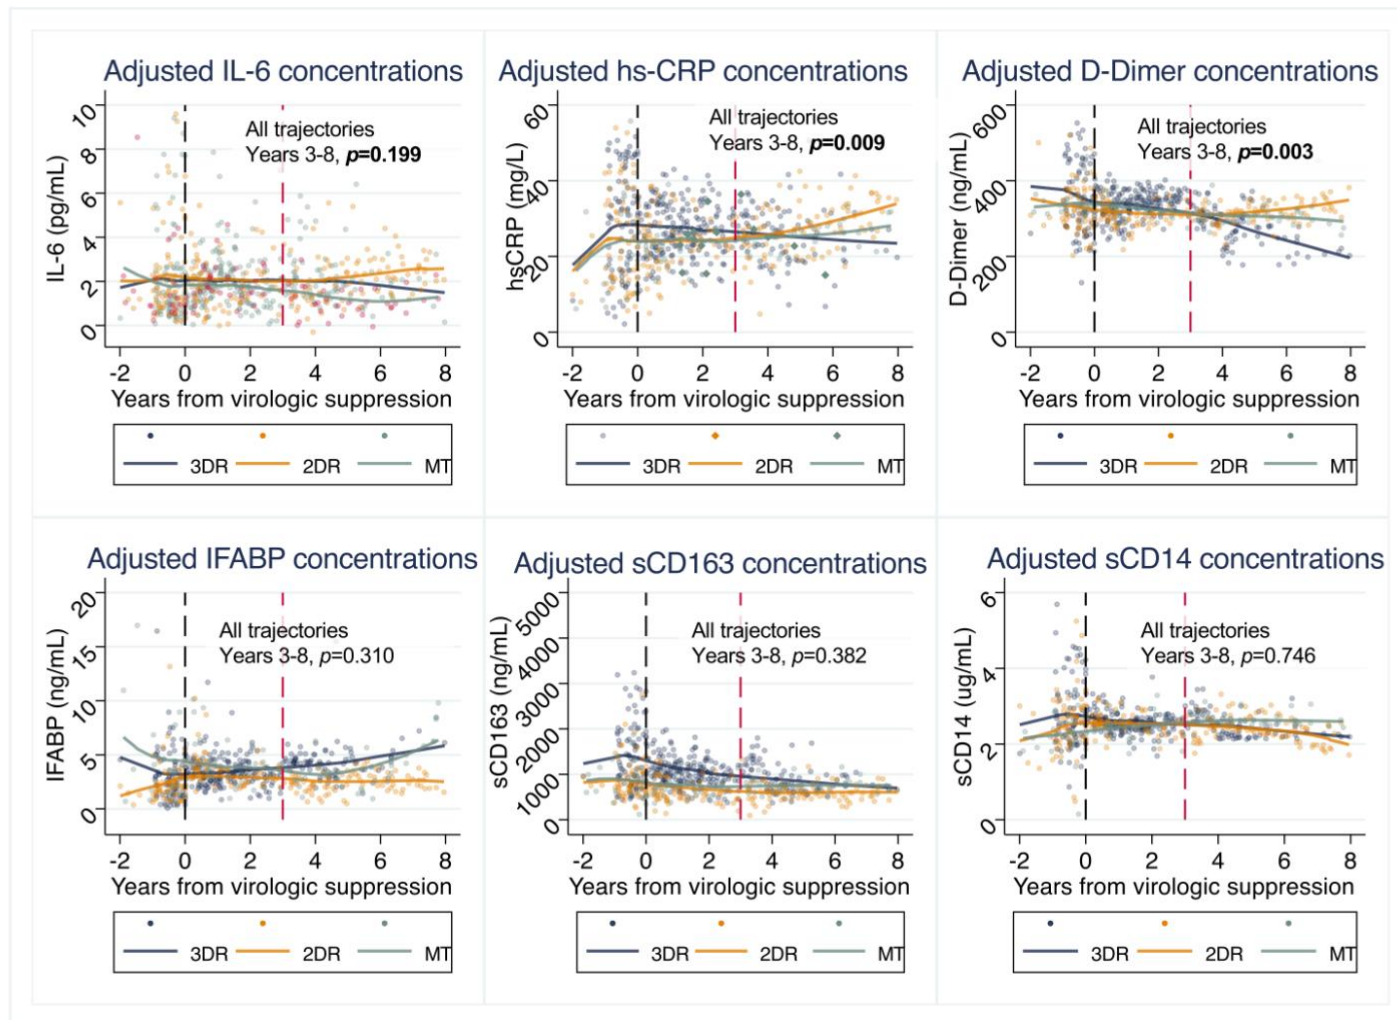

**Figure S1. Effects of switch to MT on inflammatory biomarkers compared to remaining on 3DR.** Panels represent the values predicted in piecewise linear mixed models at intervals between years 0-1, 1-2, 3-4 and 4-8, adjusted for age, sex, country of origin, mode of transmission, educational level, maximum HIV RNA, previous AIDS, nadir CD4, and pre-ART biomarker value. Lines represent predicted mean values and dots the individual observations. The P values computed using Wald tests represent the global-group comparison of biomarker trajectories from year 3 to 8. The tables piecewise comparisons for the periods 0-3 and 3-8, are provided in **Table S2**.
